# Supplementary material
Source: PubMed Central journal article supplement (PMC3670334)
Supplement: 1222433110_pnas.201222433SI.pdf [file 1222433110_pnas.201222433SI.pdf]

# Supporting Information

Swietach et al. 10.1073/pnas.1222433110

## Mathematical Supplement

**Parameters.** Parameters are presented in Table S1.

**Model Equations.** The model was solved over a 1D domain (120  $\mu\text{m}$ ), assuming uniform concentration in the radial dimension. A pH gradient was imposed by enforcing a fixed boundary condition for  $[\text{H}^+] = 10^{-6.6}$  M on the proximal end of the myocytes and  $[\text{H}^+] = 10^{-7.2}$  M on the opposite end of the myocytes. Initial intracellular free  $[\text{Ca}^{2+}]$  and free  $[\text{Mg}^{2+}]$  were set to 100 nM and 0.75 mM, respectively. Boundary conditions for all solutes, barring free  $\text{H}^+$  ions, were set to zero flux (i.e., reflection). The model consisted of a system of 23 parabolic differential equations, each representing 1 of the 23 participating solutes ( $U = [u_1, \dots, u_{23}]$ ; see Table S1), and it was solved using the pdepe function of MATLAB (MathWorks):

$$\partial U / \partial t = D \times \partial^2 U / \partial x^2 + f(U).$$

Vector  $D$  defines the diffusion coefficients of participating solutes. Function  $f$  defines the kinetics of binding between a buffer (Buf) and ligand ( $X = \text{H}^+$ ,  $\text{Ca}^{2+}$ , or  $\text{Mg}^{2+}$ ), given as:

$$\partial [\text{BufX}] / \partial t = q^x \times [X] \times [\text{Buf}] - q^x \times K_{\text{Buf}}^x \times [\text{BufX}].$$

$[\text{H}^+]$  sensitivity of  $\text{Ca}^{2+}$  binding to fast  $\text{Ca}^{2+}$  buffers (pooling troponin C, calmodulin, and sarcoplasmic reticulum  $\text{Ca}^{2+}$  pump) was coded by scaling the  $\text{Ca}^{2+}$ -binding rate constant by a factor of  $\text{H}^+ / (\text{H}^+ + K_{\text{fast}}^{\text{H}})$ , where  $K_{\text{fast}}^{\text{H}}$  is the acid dissociation constant. The value of  $K_{\text{fast}}^{\text{H}}$  was set  $10^{-6.5}$  M, which allows for a sufficient release of  $\text{Ca}^{2+}$  during uniform acid loading of the cell. This value simulates the apparent pH sensitivity of  $\text{Ca}^{2+}$  binding to troponin C (1).

**Inadequacy of Fluo3 to Generate Spatial  $\text{Ca}^{2+}/\text{H}^+$  Interactions.** The exogenous fluorescent dye Fluo3 is, effectively, a mobile  $\text{Ca}^{2+}/\text{H}^+$  buffer because of its affinity for  $\text{Ca}^{2+}$ , and pH sensitivity of fluorescence (2). The dye's apparent acid dissociation constant  $\text{p}K_{\text{H}}$  was estimated to be  $\sim 5.7$  based on the  $F/F_0$  fall recorded with 1,2-bis(o-aminophenoxy)ethane- $\text{N},\text{N},\text{N}',\text{N}'$ -tetraacetic acid-pretreated cells exposed to acetate [intracellular pH ( $\text{pH}_i$ ) drop from 7.2 to 6.6; Fig. 1 B, v)]. Under these  $\text{Ca}^{2+}$ -clamp conditions, changes in fluorescence would be due to a pH artifact of the dye. Using the dye's diffusion coefficient in myoplasm [ $25 \mu\text{m}^2/\text{s}$  (3)],

the spatial  $\text{Ca}^{2+}/\text{H}^+$  interaction was simulated assuming no histidyl dipeptide (HDP) or ATP. A  $\text{pH}_i$  gradient of 0.6 unit produced a longitudinal  $[\text{Ca}^{2+}]$  gradient of  $<10$  nM with  $25 \mu\text{M}$  Fluo3. Even after raising intracellular Fluo3 concentration by a factor of 1,000, the  $[\text{Ca}^{2+}]$  gradient was no greater than 15 nM. Thus, Fluo3 alone cannot produce the experimentally observed spatial  $\text{Ca}^{2+}/\text{H}^+$  interaction.

**Inadequacy of Plasmalemmal  $\text{Ca}^{2+}/\text{H}^+$  Pump to Generate Spatial  $\text{Ca}^{2+}/\text{H}^+$  Interactions.** The plasmalemmal  $\text{Ca}^{2+}$  ATPase (PMCA) has been proposed to function as a  $\text{Ca}^{2+}/\text{H}^+$  exchanger (4). Hypothetically, it is possible for PMCA-mediated  $\text{Ca}^{2+}/\text{H}^+$  exchange to produce a local rise in  $[\text{Ca}^{2+}]$  in the acidic microdomain. If the  $[\text{H}^+]$  microdomain were maintained, the  $[\text{Ca}^{2+}]$  gradient established by regional PMCA activity would also be stable. To test whether PMCA could provide a mechanistic explanation for the experimentally observed spatial  $\text{Ca}^{2+}/\text{H}^+$  interactions, the model was modified to introduce a boundary flux term for free  $\text{Ca}^{2+}$  ions. PMCA flux ( $J_p$ ) was defined by a Hill equation (5, 6):

$$J_p = V_{\text{max}} \times [\text{Ca}^{2+}]^n / ([\text{Ca}^{2+}]^n + K_p^n).$$

The pump's maximal transport rate ( $V_{\text{max}}$ ), Hill cooperativity ( $n$ ), and  $\text{Ca}^{2+}$  affinity ( $K_p$ ) at  $\text{pH} = 7.2$  were set to  $2.2 \mu\text{M}/\text{s}$ , 1.6, and  $0.5 \mu\text{M}$ , respectively (7). A "leak"  $\text{Ca}^{2+}$  influx was included in the  $\text{Ca}^{2+}$  boundary condition to balance  $J_p$  at diastolic  $[\text{Ca}^{2+}]_i$ , thus ensuring stable  $[\text{Ca}^{2+}]_i$  of 100 nM under resting conditions at  $\text{pH} = 7.2$ . The effect of pH on plasmalemmal  $\text{Ca}^{2+}$  stoichiometry (PMCA) was simulated by varying  $V_{\text{max}}$  or  $K_p$  (at constant  $\text{Ca}^{2+}$  leak). The simulation was run in the absence of HDPs and ATP (while keeping the effective  $\text{Ca}^{2+}$  diffusion coefficient constant). To produce an 80-nM  $[\text{Ca}^{2+}]$  gradient over a 0.6-unit  $\text{pH}_i$  gradient, it was necessary to reduce  $V_{\text{max}}$  by  $>20$ -fold or  $K_p$  by greater than sevenfold, while maintaining a relatively high sarcolemmal inward leak of  $0.16 \mu\text{M}/\text{s}$ . This exceptionally steep  $\text{pH}_i$  sensitivity and large  $\text{Ca}^{2+}$  leak were deemed incompatible with the kinetics of PMCA activity and experimental conditions (absence of extracellular  $\text{Ca}^{2+}$  would curtail inward leak). Thus,  $\text{Ca}^{2+}/\text{H}^+$  exchange on PMCA was deemed highly unlikely as an underlying mechanism for spatial  $\text{Ca}^{2+}/\text{H}^+$  interactions.

1. Crampin EJ, Smith NP, Langham AE, Clayton RH, Orchard CH (2006) Acidosis in models of cardiac ventricular myocytes. *Philos Transact A Math Phys Eng Sci* 364(1842):1171–1186.
2. Minta A, Kao JP, Tsien RY (1989) Fluorescent indicators for cytosolic calcium based on rhodamine and fluorescein chromophores. *J Biol Chem* 264(14):8171–8178.
3. Cordeiro JM, et al. (2001) Location of the initiation site of calcium transients and sparks in rabbit heart Purkinje cells. *J Physiol* 531(Pt 2):301–314.
4. Kuwayama H (1988) The membrane potential modulates the ATP-dependent  $\text{Ca}^{2+}$  pump of cardiac sarcolemma. *Biochim Biophys Acta* 940(2):295–299.

5. Choi HS, Eisner DA (1999) The role of sarcolemmal  $\text{Ca}^{2+}$ -ATPase in the regulation of resting calcium concentration in rat ventricular myocytes. *J Physiol* 515(Pt 1): 109–118.
6. Bassani JW, Bassani RA, Bers DM (1994) Relaxation in rabbit and rat cardiac cells: species-dependent differences in cellular mechanisms. *J Physiol* 476(2):279–293.
7. Shannon TR, Wang F, Puglisi J, Weber C, Bers DM (2004) A mathematical treatment of integrated Ca dynamics within the ventricular myocyte. *Biophys J* 87(5): 3351–3371.

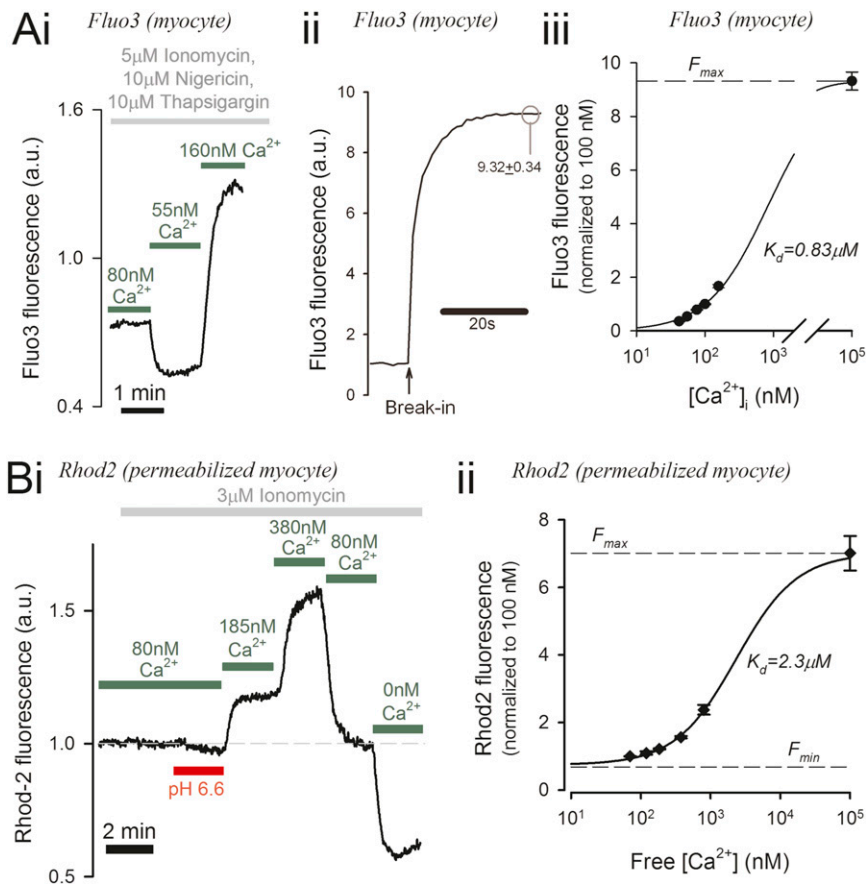

**Fig. S1.** Calibration of  $\text{Ca}^{2+}$  indicator dyes in cardiac ventricular myocytes. (A) Calibration of Fluo3. (i) Fluo3 acetoxyethyl (AM)-loaded myocyte, superfused in high- $\text{K}^+$  buffer [140 mM KCl, 20 mM Hepes, 0.5 mM EGTA, 1 mM  $\text{MgCl}_2$  (pH 7.2)] containing 10  $\mu\text{M}$  thapsigargin [to block sarcoplasmic reticulum  $\text{Ca}^{2+}$  (SERCA)], 10  $\mu\text{M}$  nigericin (to equilibrate intra- and extracellular pH), and 5  $\mu\text{M}$  ionomycin (to equilibrate intra- and extracellular  $\text{Ca}^{2+}$ ). Extracellular  $\text{Ca}^{2+}$  was varied by adding  $\text{CaCl}_2$  to attain  $[\text{Ca}^{2+}]_i$  as indicated (calculated using CaBuf software; G. Droogmans, Leuven, Belgium). (ii) Fluo3 AM-loaded myocyte superfused in 0Na-0Ca solution containing 10 mM 2,3-butanedione monoxime (to block contraction) and 10  $\mu\text{M}$  thapsigargin. A patch pipette containing 100 mM K-gluconate, 30 mM KCl, 10 mM Hepes, and 1 mM  $\text{CaCl}_2$  at pH 7.2 was attached to cell. Maximal fluorescence at saturating  $[\text{Ca}^{2+}]_i$  was measured after perforating the membrane under the patch pipette with suction. (iii) Calibration curve. (B) Calibration of Rhod2 in saponin-permeabilized cells treated with 3  $\mu\text{M}$  ionomycin. (i) Extramitochondrial  $[\text{Ca}^{2+}]_i$  was varied by changing the total  $[\text{Ca}^{2+}]_i$  added to 1,2-bis(o-aminophenoxy)ethane- $\text{N,N,N',N'}$ -tetraacetic acid (BAPTA)-buffered solutions (calculated using CaBuf software). (ii) Calibration curve.

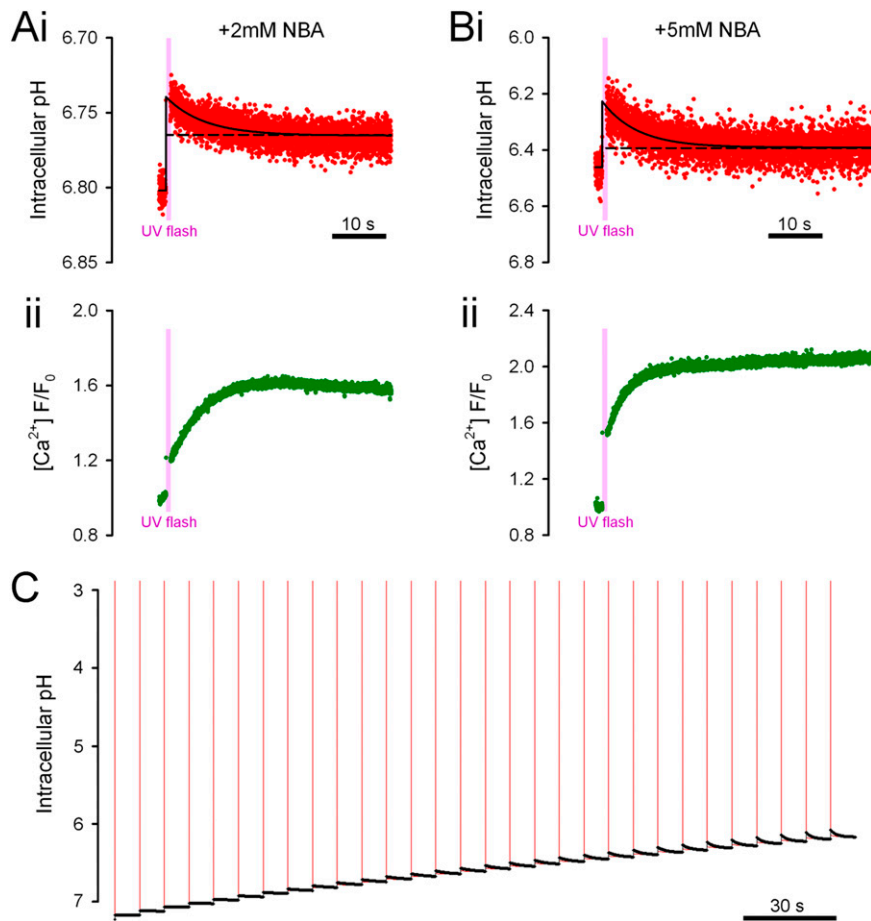

**Fig. S2.** Photolytic uncaging of  $H^+$  ions drives intrinsic buffers out of equilibrium. (A) Single, whole-cell UV flash applied to cell superfused with 0Na-0Ca solution containing 2 mM 2-nitrobenzaldehyde (NBA), the membrane-permeant caged  $H^+$  compound. (i) Fast time-base recordings show that pH (measured in cSNARF1 [5-(and-6)-carboxysemaphtharhodafluor-1]-loaded myocytes) relaxes to its equilibrium level with a time constant of  $\sim 6$  s. The dashed line shows equilibrium pH, predicted from buffering capacity measurements (1). (ii) Photolytic  $H^+$  release evokes a delayed rise in  $[Ca^{2+}]$  (measured in Fluo3-loaded myocytes;  $n = 5$ ). (B) Experiments in A repeated with 5 mM NBA ( $n = 5$ ). (C) Three-buffer mathematical model of  $pH_i$  dynamics [featuring two intrinsic buffers (2) and the pH-sensitive dye cSNARF1] was used to simulate the actual (red) and cSNARF1-reported (black)  $pH_i$  time course during repeated (once every 9 s) uncaging from 1 mM NBA. The cSNARF1-reported  $pH_i$  time course was derived using the Henderson-Hasselbalch equation from the concentration of protonated and unprotonated dye. The concentration and  $pK$  (measure of apparent  $H^+$  affinity) of cSNARF1 were  $400 \mu M$  and 7.5, respectively (3). The relatively slow kinetics of buffering allow for large  $pH_i$  excursions during rapid photolytic  $H^+$  uncaging.

- Zaniboni M, et al. (2003) Intracellular proton mobility and buffering power in cardiac ventricular myocytes from rat, rabbit, and guinea pig. *Am J Physiol Heart Circ Physiol* 285(3): H1236-H1246.
- Swietach P, Vaughan-Jones RD (2005) Relationship between intracellular pH and proton mobility in rat and guinea-pig ventricular myocytes. *J Physiol* 566(Pt 3):793-806.
- Vaughan-Jones RD, Peercy BE, Keener JP, Spitzer KW (2002) Intrinsic  $H(+)$  ion mobility in the rabbit ventricular myocyte. *J Physiol* 541(Pt 1):139-158.

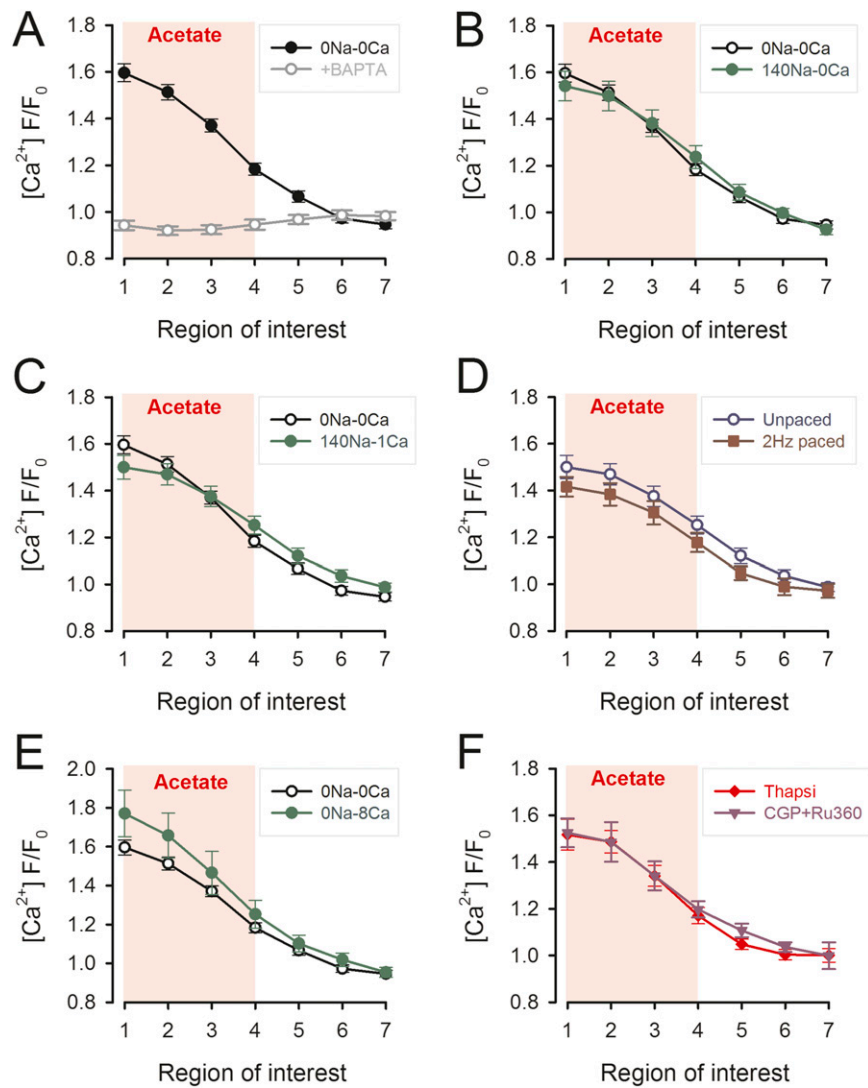

**Fig. S3.**  $[Ca^{2+}]_i$  gradients measured under different experimental conditions in response to a  $pH_i$  microdomain. A 0.6-unit longitudinal  $pH_i$  gradient was established and maintained by regional exposure of a myocyte to 80 mM acetate using a dual-microperfusion apparatus (with the microstream boundary placed perpendicular to the cell along its center).  $[Ca^{2+}]_i$  was imaged in Fluo3-loaded myocytes at 5 min of dual microperfusion. (A) In the absence of  $Na^+$  (replaced with NMDG) and  $Ca^{2+}$  (replaced with EGTA), regional exposure to acetate in 0Na and 0Ca microstreams produced a large  $[Ca^{2+}]_i$  gradient ( $n = 25$ ), which was abolished in cells preloaded with the  $Ca^{2+}$  buffer BAPTA (100  $\mu$ M, AM-loaded;  $n = 18$ ). (B) Raising  $[Na^+]_i$  in both microstreams to the physiological level of 140 mM did not affect the  $[Ca^{2+}]_i$  gradient ( $n = 15$ ). Cariporide (30  $\mu$ M) was added to both microstreams to inhibit sarcolemmal  $Na^+/H^+$  exchange (NHE). (C) Raising  $[Na^+]_i$  and  $[Ca^{2+}]_i$  in both microstreams to their physiological levels of 140 mM and 1 mM, respectively, did not affect the  $[Ca^{2+}]_i$  gradient ( $n = 9$ ). Cariporide (30  $\mu$ M) was added to both microstreams to inhibit NHE. To account for  $Ca^{2+}$  binding to acetate, total  $[Ca^{2+}]$  in the acetate-containing microstream was 1.2 mM (giving 1 mM  $[Ca^{2+}]_i$ , confirmed with a  $Ca^{2+}$  microelectrode). (D) Experiment in normal extracellular  $Na^+$  and  $Ca^{2+}$  repeated on electrically paced myocytes (2-Hz field stimulation), showing no effect of excitation/contraction coupling on the  $pH_i$ -evoked  $Ca^{2+}$  gradient ( $n = 18$ ). (E)  $[Ca^{2+}]_i$  gradients were only modestly increased when  $Ca^{2+}$  extrusion on PMCA was blocked by raising extracellular  $Ca^{2+}$  to 8 mM, following a 3-min cell pretreatment in 0Na-0Ca solution ( $n = 7$ ). (F) Experiments in the absence of extracellular  $Na^+$  and  $Ca^{2+}$  performed on myocytes treated with thapsigargin (Thapsi) to inhibit SERCA activity and empty the sarcoplasmic reticulum (SR; 10-min pretreatment with 10  $\mu$ M Thapsi;  $n = 20$ ) or on myocytes exposed to the mitochondrial  $Na^+/Ca^{2+}$  blocker CGP-37157 (20  $\mu$ M) and the  $Ca^{2+}$ -uniporter blocker ruthenium-360 (Ru360; 5  $\mu$ M) to block  $Ca^{2+}$  fluxes in and out of mitochondria ( $n = 7$ ). Neither treatment abolished the  $[Ca^{2+}]_i$  gradients.

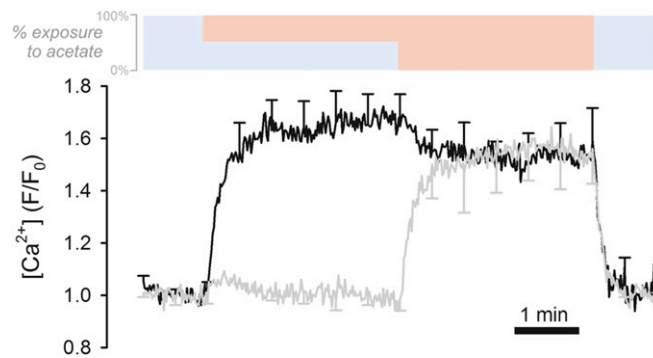

**Fig. 54.** Local exposure to 80 mM acetate (shaded in pink) produces a  $[Ca^{2+}]_i$  gradient that does not dissipate, reaching  $[Ca^{2+}]_i$  at the proximal (acetate-exposed) end of 1.67 normalized fluorescence ( $F/F_0$ ) units. On subsequent whole-cell exposure to acetate, distal  $[Ca^{2+}]_i$  rises to 1.56  $F/F_0$ , whereas proximal  $[Ca^{2+}]_i$  falls by 20% (NB:  $[H^+]_i$  in the proximal region of interest falls by only 10%; Fig. 4 B, i). During local acetate exposure, proximal  $[Ca^{2+}]_i$  is elevated by an active mechanism.

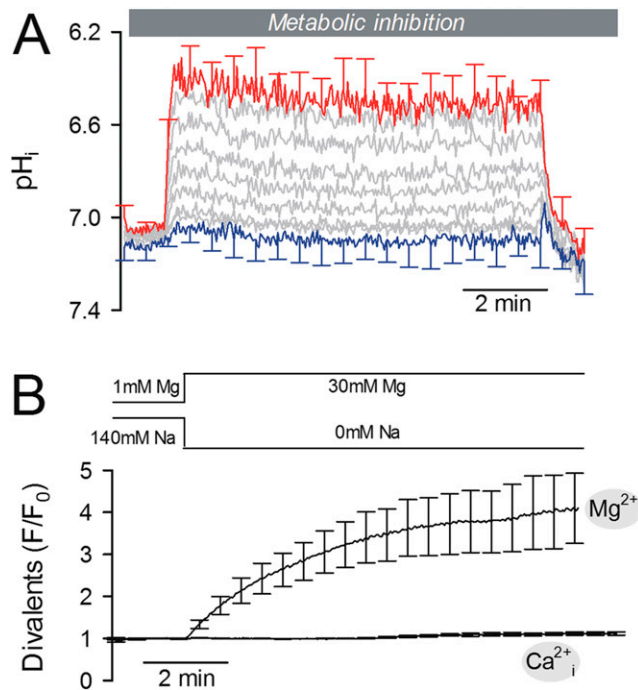

**Fig. 55.** (A)  $pH_i$  gradient in metabolically inhibited myocytes. A cardiac myocyte was treated with 10  $\mu M$  rotenone, 10  $\mu M$  antimycin A, and 5 mM deoxyglucose (in the absence of glucose) to inhibit metabolism. The  $pH_i$  gradient was subsequently established by exposing half of the myocyte to 0Na-0Ca solution containing 80 mM acetate and to acetate-free 0Na-0Ca in the remainder of the cell, using dual microperfusion. The  $pH_i$  gradient was no different from that produced in control cells without metabolic inhibitors ( $n = 15$ ). (B) Loading myocytes with  $Mg^{2+}$  using the method of Almulla et al. (1). Myocytes were AM-loaded with either Fluo3, to report cytoplasmic  $[Ca^{2+}]_i$ , or MagFluo4, to report cytoplasmic  $[Mg^{2+}]_i$ .  $Mg^{2+}$  loading was triggered by raising extracellular  $Mg^{2+}$  (from 1 to 30 mM) and removing extracellular  $Na^+$  (replacing with *N*-methyl-D-glucamine) ( $n = 10$  each).

1. Almulla HA, Bush PG, Steele MG, Ellis D, Flatman PW (2006) Loading rat heart myocytes with  $Mg^{2+}$  using low- $[Na^+]_o$  solutions. *J Physiol* 575(Pt 2):443–454.

**Table S1. Parameterization of constants for diffusion-reaction model**

| Parameter       | Definition                                                                 | Value                                  | Reference          |
|-----------------|----------------------------------------------------------------------------|----------------------------------------|--------------------|
| $D_H$           | Cytoplasmic free $H^+$ diffusion coefficient                               | $6000 \mu\text{m}^2/\text{s}$          | (1)                |
| $D_{Ca}$        | Cytoplasmic free $Ca^{2+}$ diffusion coefficient                           | $300 \mu\text{m}^2/\text{s}$           | (2-4)              |
| $D_{Mg}$        | Cytoplasmic free $Mg^{2+}$ diffusion coefficient                           | $300 \mu\text{m}^2/\text{s}$           | as $D_{Ca}$        |
| $q^H$           | $H^+$ binding rate constant                                                | $100 \mu\text{M}^{-1} \text{s}^{-1}$   | (1)                |
| $q^{Ca}_{fast}$ | $Ca^{2+}$ binding rate constant to fast $Ca^{2+}$ buffer, ATP, HDP, Fluo3. | $30 \mu\text{M}^{-1} \text{s}^{-1}$    | (5)                |
| $q^{Ca}_{slow}$ | $Ca^{2+}$ binding rate constant to slow $Ca^{2+}$ buffer                   | $2.4 \mu\text{M}^{-1} \text{s}^{-1}$   | (5)                |
| $q^{Mg}_{fast}$ | $Mg^{2+}$ binding rate constant to ATP, HDP                                | $30 \mu\text{M}^{-1} \text{s}^{-1}$    | as $q^{Ca}_{fast}$ |
| $q^{Mg}_{slow}$ | $Mg^{2+}$ binding rate constant to slow $Ca^{2+}$ buffer                   | $0.003 \mu\text{M}^{-1} \text{s}^{-1}$ | (5)                |
| $C_{fix}$       | Fixed $H^+$ -buffer concentration                                          | 62.4 mM                                | *, (6, 7)          |
| $K^H_{fix}$     | Fixed $H^+$ -buffer $H^+$ affinity                                         | $10^{-6.30} \text{M}$                  | *, (6, 7)          |
| $D_{mob}$       | Nondipeptide mobile buffer diffusion coefficient                           | $22 \mu\text{m}^2/\text{s}$            | *, (6, 7)          |
| $C_{mob}$       | Nondipeptide mobile $H^+$ -buffer concentration                            | 5.67 mM                                | *, (6, 7)          |
| $K^H_{mob}$     | Nondipeptide mobile $H^+$ -buffer $H^+$ affinity                           | $10^{-8.47} \text{M}$                  | *, (6, 7)          |
| $D_{buf}$       | Pooled fast/slow $Ca^{2+}$ buffer diffusion coefficient                    | $0 \mu\text{m}^2/\text{s}$             |                    |
| $C_{fast}$      | Fast $Ca^{2+}$ buffer concentration                                        | 120 $\mu\text{M}$                      | (5)                |
| $K^{Ca}_{fast}$ | Fast $Ca^{2+}$ buffer $Ca^{2+}$ affinity                                   | $10^{-6.23} \text{M}$                  | (5)                |
| $C_{slow}$      | Slow $Ca^{2+}$ buffer concentration                                        | 140 $\mu\text{M}$                      | (5)                |
| $K^{Ca}_{slow}$ | Slow $Ca^{2+}$ buffer $Ca^{2+}$ affinity                                   | $10^{-7.87} \text{M}$                  | (5)                |
| $K^{Mg}_{slow}$ | Slow $Ca^{2+}$ buffer $Mg^{2+}$ affinity                                   | $10^{-2.95} \text{M}$                  | (5)                |
| $C_{carn}$      | Histidyl-dipeptide concentration                                           | 17 mM                                  | *, (6, 7)          |
| $K^H_{carn}$    | Histidyl-dipeptide $H^+$ affinity                                          | $10^{-6.8} \text{M}$                   | (8)                |
| $K^{Ca}_{carn}$ | Histidyl-dipeptide $Ca^{2+}$ affinity                                      | $10^{-3.22} \text{M}$                  | (8)                |
| $K^{Mg}_{carn}$ | Histidyl-dipeptide $Mg^{2+}$ affinity                                      | $10^{-3.1} \text{M}$                   | (8)                |
| $D_{carn}$      | Histidyl-dipeptide diffusion coefficient                                   | $225 \mu\text{m}^2/\text{s}$           | *, (6, 7)          |
| $C_{atp}$       | ATP concentration                                                          | 7.5 mM                                 | (9, 10)            |
| $K^H_{atp}$     | ATP $H^+$ affinity                                                         | $10^{-6.49} \text{M}$                  | (11)               |
| $K^{Ca}_{atp}$  | ATP $Ca^{2+}$ affinity                                                     | $10^{-4.66} \text{M}$                  | (9)                |
| $K^{Mg}_{atp}$  | ATP $Mg^{2+}$ affinity                                                     | $10^{-4.36} \text{M}$                  | (9)                |
| $D_{atp}$       | ATP diffusion coefficient                                                  | $150 \mu\text{m}^2/\text{s}$           | (2)                |
| $C_{fluo}$      | Fluo3 concentration                                                        | 25 $\mu\text{M}$                       | (5)                |
| $K^H_{fluo}$    | Fluo3 $H^+$ affinity                                                       | $10^{-5.7} \text{M}$                   | Fig. 1B            |
| $K^{Ca}_{fluo}$ | Fluo3 $Ca^{2+}$ affinity                                                   | $10^{-6.08} \text{M}$                  | Fig. S1A           |
| $D_{fluo}$      | Fluo3 diffusion coefficient                                                | $25 \mu\text{m}^2/\text{s}$            | (2)                |

Where applicable, parameters corrected to 37°C (2).

\*Derived from three-component buffer best-fit to intrinsic  $H^+$ -mobility and buffering capacity data.

- Swietach P, Leem CH, Spitzer KW, Vaughan-Jones RD (2005) Experimental generation and computational modeling of intracellular pH gradients in cardiac myocytes. *Biophys J* 88(4):3018–3037.
- Cordeiro JM, et al. (2001) Location of the initiation site of calcium transients and sparks in rabbit heart Purkinje cells. *J Physiol* 531(Pt 2):301–314.
- Kushmerick MJ, Podolsky RJ (1969) Ionic mobility in muscle cells. *Science* 166(3910):1297–1298.
- Swietach P, Spitzer KW, Vaughan-Jones RD (2008)  $Ca^{2+}$ -mobility in the sarcoplasmic reticulum of ventricular myocytes is low. *Biophys J* 95(3):1412–1427.
- Shannon TR, Wang F, Puglisi J, Weber C, Bers DM (2004) A mathematical treatment of integrated Ca dynamics within the ventricular myocyte. *Biophys J* 87(5):3351–3371.
- Swietach P, Vaughan-Jones RD (2005) Relationship between intracellular pH and proton mobility in rat and guinea-pig ventricular myocytes. *J Physiol* 566(Pt 3):793–806.
- Swietach P, Spitzer KW, Vaughan-Jones RD (2007) pH-Dependence of extrinsic and intrinsic  $H(+)$ -ion mobility in the rat ventricular myocyte, investigated using flash photolysis of a caged- $H(+)$  compound. *Biophys J* 92(2):641–653.
- Baran EJ (2000) Metal complexes of carnosine. *Biochemistry (Mosc)* 65(7):789–797.
- Kargacin ME, Kargacin GJ (1997) Predicted changes in concentrations of free and bound ATP and ADP during intracellular  $Ca^{2+}$  signaling. *Am J Physiol Cell Physiol* 273:C1416–C1426.
- Vaughan-Jones RD, Peercy BE, Keener JP, Spitzer KW (2002) Intrinsic  $H(+)$  ion mobility in the rabbit ventricular myocyte. *J Physiol* 541(Pt 1):139–158.
- Kushmerick MJ (1997) Multiple equilibria of cations with metabolites in muscle bioenergetics. *Am J Physiol* 272(5 Pt 1):C1739–C1747.
